# Supplementary material for: Temporal genetic changes in Plasmodium vivax apical membrane antigen 1 over 19 years of transmission in southern Mexico
Source: PubMed Central journal article supplement (PMC5414334; doi:10.1186/s13071-017-2156-y), 2017-05-02
Supplement: 13071_2017_2156_MOESM5_ESM.pdf [file 13071_2017_2156_MOESM5_ESM.pdf]

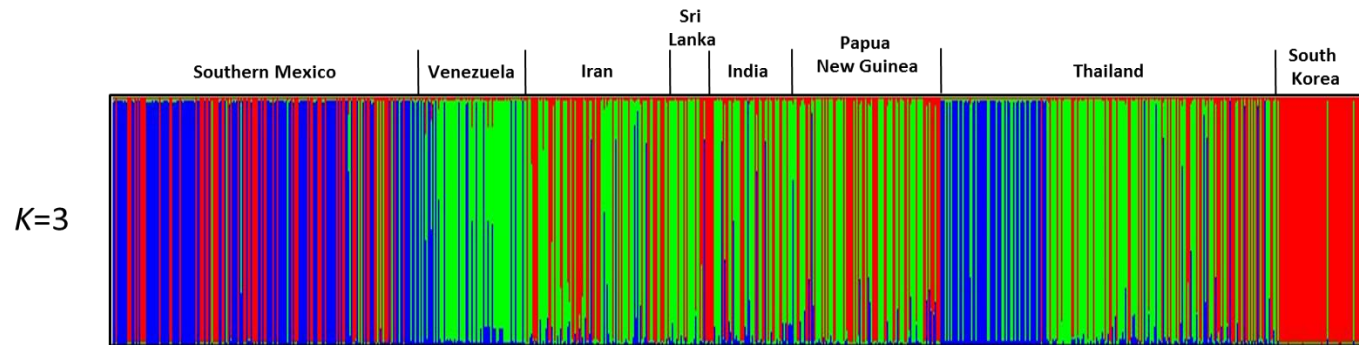

### Additional file 5

Population structure of *P. vivax* based on *pvamaI*<sub>I-II</sub>. Colors (red, blue and green) represent the resulting populations ( $K = 3$ ) from Bayesian clustering analysis. A vertical bar represents each individual.
